# Supplementary material for: Anoxia stimulates microbially catalyzed metal release from Animas River sediments
Source: Royal Society of Chemistry journal article supplement (doi:10.1039/c7em00036g), 2017-01-01
Supplement: c7em00036g1.pdf [file c7em00036g1.pdf]

## Supporting Information

# Anoxia stimulates microbially catalyzed metal release from Animas River sediments

*Casey M. Saup<sup>1</sup>, Kenneth H. Williams<sup>2</sup>, Lucia Rodriguez-Freire<sup>3</sup>, José M. Cerrato<sup>3</sup>, Michael D.*

*Johnston<sup>1</sup>, and Michael J. Wilkins<sup>1,4\*</sup>*

\*Corresponding email address: wilkins.231@osu.edu

Telephone: (509-713-3041)

<sup>1</sup>School of Earth Sciences, The Ohio State University, Columbus, OH, 43214

<sup>2</sup>Earth Sciences Division, Lawrence Berkeley National Laboratory, Berkeley, CA, 94720

<sup>3</sup>Department of Civil Engineering, University of New Mexico, Albuquerque, NM, 87131

<sup>4</sup>Microbiology Department, The Ohio State University, Columbus, OH, 43214

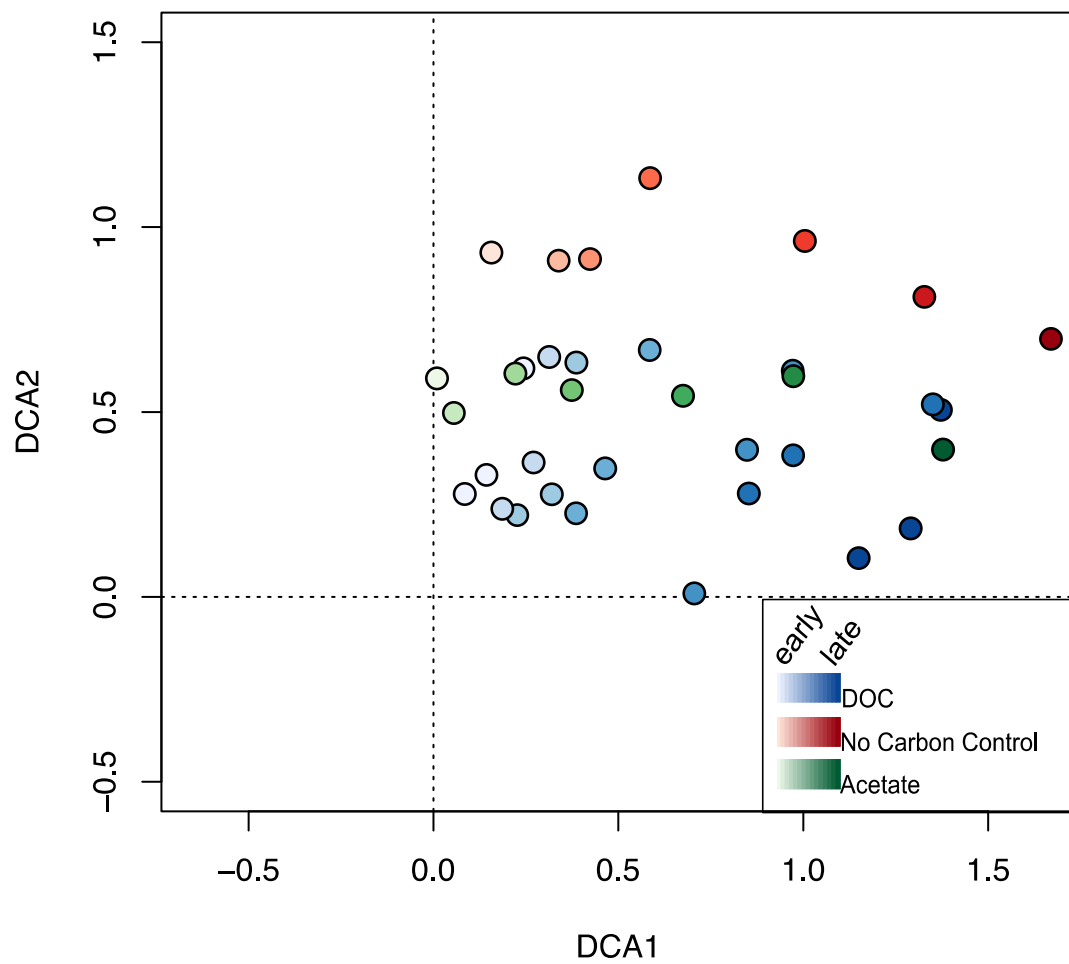

**Figure S1** A detrended correspondence analysis of Oxbow Park microbial community data (16S rRNA). In removing the curvature of the NMDS, a similar pattern is still observed indicating that the trends are not an artefact.
