# Supplementary material for: Anoxia stimulates microbially catalyzed metal release from Animas River sediments
Source: Royal Society of Chemistry journal article supplement (doi:10.1039/c7em00036g), 2017-01-01
Supplement: c7em00036g2.xlsx [file c7em00036g2.xlsx]

## Sheet: Geochem Data
A72 DOC Microcosm 1								A72 DOC Microcosm 2								A72 DOC Microcosm 3								A72 Negative Control (No Carbon Added)								A72 Positive Control (Acetate Added)
	Time 0	Time 1	Time 2	Time 3	Time 4	Time 5	Time 6		Time 0	Time 1	Time 2	Time 3	Time 4	Time 5	Time 6		Time 0	Time 1	Time 2	Time 3	Time 4	Time 5	Time 6		Time 0	Time 1	Time 2	Time 3	Time 4	Time 5	Time 6		Time 0	Time 1	Time 2	Time 3	Time 4	Time 5	Time 6
	0 Days	4 Days	7 Days	14 Days	21 Days	24 Days	28 Days		0 Days	4 Days	7 Days	14 Days	21 Days	24 Days	28 Days		0 Days	4 Days	7 Days	14 Days	21 Days	24 Days	28 Days		0 Days	4 Days	7 Days	14 Days	21 Days	24 Days	28 Days		0 Days	4 Days	7 Days	14 Days	21 Days	24 Days	28 Days
Isotope	Concentration AVG	Concentration AVG	Concentration AVG	Concentration AVG	Concentration AVG	Concentration AVG	Concentration AVG	Isotope	Concentration AVG	Concentration AVG	Concentration AVG	Concentration AVG	Concentration AVG	Concentration AVG	Concentration AVG	Isotope	Concentration AVG	Concentration AVG	Concentration AVG	Concentration AVG	Concentration AVG	Concentration AVG	Concentration AVG	Isotope	Concentration AVG	Concentration AVG	Concentration AVG	Concentration AVG	Concentration AVG	Concentration AVG	Concentration AVG	Isotope	Concentration AVG	Concentration AVG	Concentration AVG	Concentration AVG	Concentration AVG	Concentration AVG	Concentration AVG
Sr88(LR)	877.309	909.022	946.429	962.14	869.291	914.178	969.496	Sr88(LR)	877.309	910.534	1079.38	959.318	895.597	905.347	909.874	Sr88(LR)	877.309	893.775	920.222	902.891	775.776	801.255	803.414	Sr88(LR)	877.309	921.628	915.193	954.262	872.401	903.729	950.291	Sr88(LR)	877.309	726.918	645.423	707.751	761.695	774.299	773.356
Mo98(LR)	0.06	0.368	0.074	0.093	0.116	0.071	0.076	Mo98(LR)	0.06	0.173	7.784	0.251	0.298	0.081	0.114	Mo98(LR)	0.06	1.613	0.107	0.196	0.105	0.076	0.153	Mo98(LR)	0.06	0.079	0.053	0.099	0.118	0.078	0.1	Mo98(LR)	0.06	0.144	0.062	0.117	0.205	0.138	1.132
Hg200(LR)	0.095	0.023	-0.002	-0.001	-0.029	-0.026	-0.029	Hg200(LR)	0.095	0.03	0.053	0.016	-0.012	-0.021	-0.033	Hg200(LR)	0.095	0.022	0.024	0.015	-0.035	-0.033	-0.025	Hg200(LR)	0.095	0.092	0.054	0.037	0.005	0.007	0.004	Hg200(LR)	0.095	-0.03	-0.031	-0.025	-0.033	-0.034	-0.025
Pb208(LR)	14.549	36.556	12.731	11.042	11.815	6.645	4.953	Pb208(LR)	14.549	14.368	498.151	12.624	24.839	6.613	8.917	Pb208(LR)	14.549	92.911	12.914	17.601	9.542	4.881	11.146	Pb208(LR)	14.549	11.206	11.141	13.434	13.365	7.464	8.784	Pb208(LR)	14.549	10.633	7.975	11.783	17.524	11.268	50.496
Cr53(MR)	0.318	1.038	0.685	0.364	0.951	0.394	0.194	Cr53(MR)	0.318	1.017	7.072	0.467	0.905	0.26	0.283	Cr53(MR)	0.318	1.512	0.618	0.371	0.711	0.313	0.239	Cr53(MR)	0.318	1.389	0.364	0.291	0.791	0.352	0.246	Cr53(MR)	0.318	1.164	0.418	0.326	1.009	0.458	0.983
Cu65(MR)	229.661	89.825	57.637	29.028	7.626	9.023	5.829	Cu65(MR)	229.661	96.03	133.363	26.282	8.936	6.886	6.132	Cu65(MR)	229.661	77.746	37.38	23.88	5.408	4.373	5.706	Cu65(MR)	229.661	55.409	38.403	23.638	6.772	7.516	6.457	Cu65(MR)	229.661	27.264	22.605	22.293	6.168	5.144	18.169
Zn66(MR)	1342.04	1946.65	2012.63	2156.31	1565.34	1574.23	1579.98	Zn66(MR)	1342.04	1983.83	2045.56	2074.06	1428.82	1416.45	1392.29	Zn66(MR)	1342.04	1796.66	1776.66	1804.03	1172.51	1152.27	1054.25	Zn66(MR)	1342.04	1922.29	1945.57	1917.2	1353.73	1347.79	1329.23	Zn66(MR)	1342.04	1177.89	1058.12	1108.36	1038.61	1128	1067.07
As75(HR)	0.408	1.423	0.424	0.434	0.575	0.447	0.598	As75(HR)	0.408	0.814	46.922	0.804	1.197	0.545	0.689	As75(HR)	0.408	14.135	0.568	1.315	0.585	0.355	0.755	As75(HR)	0.408	0.425	0.133	0.231	0.251	0.231	0.271	As75(HR)	0.408	0.758	0.457	0.621	0.873	0.657	6.888
Oxbow DOC Microcosm 1								Oxbow DOC Microcosm 2								Oxbow DOC Microcosm 3								Oxbow Negative Control (No Carbon Added)								Oxbow Positive Control (Acetate Added)
	Time 0	Time 1	Time 2	Time 3	Time 4	Time 5	Time 6		Time 0	Time 1	Time 2	Time 3	Time 4	Time 5			Time 0	Time 1	Time 2	Time 3	Time 4	Time 5			Time 0	Time 2	Time 3	Time 4	Time 5	Time 6			Time 0	Time 1	Time 2	Time 3	Time 4	Time 5
	0 Days	4 Days	7 Days	14 Days	21 Days	24 Days	28 Days		0 Days	4 Days	7 Days	14 Days	21 Days	24 Days			0 Days	4 Days	7 Days	14 Days	21 Days	24 Days			0 Days	7 Days	14 Days	21 Days	24 Days	28 Days			0 Days	4 Days	7 Days	14 Days	21 Days	24 Days
	Concentration AVG	Concentration AVG	Concentration AVG	Concentration AVG	Concentration AVG	Concentration AVG	Concentration AVG		Concentration AVG	Concentration AVG	Concentration AVG	Concentration AVG	Concentration AVG	Concentration AVG			Concentration AVG	Concentration AVG	Concentration AVG	Concentration AVG	Concentration AVG	Concentration AVG			Concentration AVG	Concentration AVG	Concentration AVG	Concentration AVG	Concentration AVG	Concentration AVG			Concentration AVG	Concentration AVG	Concentration AVG	Concentration AVG	Concentration AVG	Concentration AVG
Sr88(LR)	1716.98	1023.71	1011.27	988.643	1232.91	1073.78	1139.27	Sr88(LR)	1716.98	941.338	790.649	1100.11	903.238	923.839		Sr88(LR)	1716.98	1178.94	1038.18	1097.62	994.325	992.536		Sr88(LR)	1716.98	1129.74	1009.99	1237.42	1089.57	1018.46		Sr88(LR)	1716.98	969.522	893.943	1027.15	892.81	792.762
Mo98(LR)	4.38	48.855	38.65	31.432	35.221	36.997	37.976	Mo98(LR)	4.38	81.446	59.577	83.315	87.632	97.512		Mo95(LR)	4.38	92.876	101.613	122.751	137.786	153.842		Mo98(LR)	4.38	85.799	70.569	116.729	134.313	144.773		Mo98(LR)	4.38	79.819	78.489	112.063	114.756	114.638
Hg200(LR)	0.068	0.045	0.033	0.02	0.012	0.007	0.012	Hg200(LR)	0.068	0.027	0.012	0.007	0.004	0.011		Hg200(LR)	0.068	-0.003	0.001	-0.001	0	0.003		Hg200(LR)	0.068	0.01	0.011	0.007	0.004	0.013		Hg200(LR)	0.068	0.02	0.012	0.002	0.013	0.026
Pb208(LR)	22.672	34.938	43.011	106.114	12.254	13.631	11.231	Pb208(LR)	22.672	38.561	17.352	16.319	15.731	18.255		Pb208(LR)	22.672	37.03	33.224	22.571	11.269	21.633		Pb208(LR)	22.672	102.597	16.888	15.516	10.154	19.521		Pb208(LR)	22.672	21.723	15.463	14.723	15.569	15.458
Cr53(MR)	0.686	0.625	1.081	2.391	0.566	0.431	0.383	Cr53(MR)	0.686	0.993	0.362	0.429	0.387	0.421		Cr53(MR)	0.686	0.442	0.345	0.566	5.166	0.446		Cr53(MR)	0.686	1.844	0.312	0.701	0.307	0.314		Cr53(MR)	0.686	0.284	0.207	0.56	0.532	0.356
Cu65(MR)	54.174	27.217	26.535	57.28	12.172	7.698	6.316	Cu65(MR)	54.174	28.901	13.142	14.094	9.063	9.935		Cu65(MR)	54.174	28.214	21.844	12.94	6.286	11.192		Cu65(MR)	54.174	59.525	13.212	13.611	5.847	10.059		Cu65(MR)	54.174	17.236	11.967	13.644	8.585	7.88
Zn66(MR)	80.641	160.174	212.865	603.974	72.213	46.545	34.106	Zn66(MR)	80.641	173.858	76.307	78.001	57.001	69.927		Zn66(MR)	80.641	89.836	97.017	57.485	88.764	56.103		Zn66(MR)	80.641	402.944	56.03	66.789	27.548	67.293		Zn66(MR)	80.641	74.941	50.057	73.359	68.094	49.865
As75(HR)	3.377	12.01	12.439	15.12	11.197	7.236	6.709	As75(HR)	3.377	9.671	7.541	8.216	5.411	6.014		As75(HR)	3.377	10.136	9.73	10.375	7.924	8.367		As75(HR)	3.377	13.167	8.334	11.401	7.423	9.173		As75(HR)	3.377	8.973	9.766	11.702	7.718	7.659
32nd Street Bridge DOC Microcosm 1								32nd Street Bridge DOC Microcosm 2								32nd Street Bridge DOC Microcosm 3								32nd Street Bridge Negative Control (No Carbon Added)								32nd Street Bridge Positive Control (Acetate Added)
	Time 0	Time 1	Time 2	Time 3	Time 4	Time 5	Time 6		Time 0	Time 1	Time 2	Time 3	Time 4	Time 5	Time 6		Time 0	Time 1	Time 2	Time 3	Time 4	Time 5	Time 6		Time 0	Time 1	Time 2	Time 3	Time 4	Time 5	Time 6		Time 0	Time 1	Time 2	Time 3	Time 4	Time 5	Time 6
	0 Days	4 Days	7 Days	14 Days	21 Days	24 Days	28 Days		0 Days	4 Days	7 Days	14 Days	21 Days	24 Days	28 Days		0 Days	4 Days	7 Days	14 Days	21 Days	24 Days	28 Days		0 Days	4 Days	7 Days	14 Days	21 Days	24 Days	28 Days		0 Days	4 Days	7 Days	14 Days	21 Days	24 Days	28 Days
	Concentration AVG	Concentration AVG	Concentration AVG	Concentration AVG	Concentration AVG	Concentration AVG	Concentration AVG		Concentration AVG	Concentration AVG	Concentration AVG	Concentration AVG	Concentration AVG	Concentration AVG	Concentration AVG		Concentration AVG	Concentration AVG	Concentration AVG	Concentration AVG	Concentration AVG	Concentration AVG	Concentration AVG		Concentration AVG	Concentration AVG	Concentration AVG	Concentration AVG	Concentration AVG	Concentration AVG	Concentration AVG		Concentration AVG	Concentration AVG	Concentration AVG	Concentration AVG	Concentration AVG	Concentration AVG	Concentration AVG
Sr88(LR)	2021.43	1129.95	391.921	1255.39	2044.08	1590.96	1889.11	Sr88(LR)	2021.43	1389.98	761.411	2074.3	1840.7	1885.53	2059.95	Sr88(LR)	2021.43	622.964	711.893	1765.65	1144.35	1548.83	1185.46	Sr88(LR)	2021.43	37.275	89.796	1108.07	1012.2	1474.46	1607.98	Sr88(LR)	2021.43	433.99	144.432	2175.18	1849.67	2136.35	1845.45
Mo98(LR)	29.778	56.069	33.92	93.758	97.285	133.817	140.104	Mo98(LR)	29.778	71.739	49.817	83.127	93.487	110.875	122.756	Mo98(LR)	29.778	38.748	46.381	91.184	108.853	118.491	133.952	Mo98(LR)	29.778	13.571	13.797	60.617	89.942	127.262	132.714	Mo98(LR)	29.778	29.208	17.563	106.933	136.956	142.77	145.818
Hg200(LR)	0.041	0.033	0.032	0.017	0.026	0.018	0.018	Hg200(LR)	0.041	0.026	0.023	0.106	0.015	0.012	0.016	Hg200(LR)	0.041	0.027	0.023	0.066	0.015	0.016	0.02	Hg200(LR)	0.041	0.026	0.022	0.05	0.012	0.014	0.017	Hg200(LR)	0.041	0.022	0.022	0.038	0.016	0.036	0.061
Pb208(LR)	26.235	18.087	50.913	13.756	13.928	15.683	9.845	Pb208(LR)	26.235	12.147	9.716	22.067	17.01	13.397	9.517	Pb208(LR)	26.235	13.276	9.708	15.237	13.961	11.13	34.082	Pb208(LR)	26.235	3.782	3.331	10.766	18.116	15.751	39.487	Pb208(LR)	26.235	5.971	3.992	21.313	7.749	7.769	26.456
Cr53(MR)	0.669	1.205	6.516	0.415	0.549	0.569	0.43	Cr53(MR)	0.669	2.343	0.964	0.611	0.773	0.648	0.48	Cr53(MR)	0.669	1.031	1.88	0.473	0.966	0.694	3.476	Cr53(MR)	0.669	2.059	0.912	0.381	0.993	0.661	1.61	Cr53(MR)	0.669	1.165	0.761	0.775	0.681	0.459	0.791
Cu65(MR)	12.056	12.112	51.16	6.955	6.175	7.299	3.867	Cu65(MR)	12.056	7.603	9.538	8.626	8.098	7.814	3.7	Cu65(MR)	12.056	14.703	9.42	6.542	8.904	6.949	14.527	Cu65(MR)	12.056	12.256	12.611	6.361	12.296	8.825	16.705	Cu65(MR)	12.056	6.397	9.166	6.512	4.123	2.304	6.869
Zn66(MR)	58.635	93.868	480.926	45.619	44.404	36.534	22.775	Zn66(MR)	58.635	53.478	57.53	66.759	50.955	45.81	25.919	Zn66(MR)	58.635	85.006	51.505	39.037	50.185	34.392	163.958	Zn66(MR)	58.635	62.202	72.976	46.163	76.955	59	138.86	Zn66(MR)	58.635	39.204	55.944	47.997	35.134	30.363	72.947
As75(HR)	3.686	7.653	16.846	8.239	6.779	7.268	6.947	As75(HR)	3.686	9.833	8.706	6.281	7.827	7.111	5.895	As75(HR)	3.686	7.741	8.468	6.043	9.149	8.24	9.738	As75(HR)	3.686	8.841	10.069	7.056	9.415	8.354	9.058	As75(HR)	3.686	7.427	9.61	7.345	14.205	12.055	11.512

## Sheet: Iron Data
32B													A72													Oxbow
T=X	Date	1 (DOC)	2 (DOC)	3 (DOC)	(Acetate)	(Control)	Date	1 (DOC)	2 (DOC)	3 (DOC)	(Acetate)	(Control)	T=X	Date	1 (DOC)	2 (DOC)	3 (DOC)	(Acetate)	(Control)	Date	1 (DOC)	2 (DOC)	3 (DOC)	(Acetate)	(Control)	T=X	Date	1 (DOC)	2 (DOC)	3 (DOC)	(Acetate)	(Control)	Date	1 (DOC)	2 (DOC)	3 (DOC)	(Acetate)	(Control)
T=0	2015-10-16	0.058	0.059	0.058	0.058	0.058	2015-10-16	0.062312	0.0633863	0.062312	0.062312	0.062312	T=0	2015-10-16	0.133	0.171	0.097	0.139	0.164	2015-10-16	0.142888	0.183713	0.104211	0.149334	0.176193	T=0	2015-10-16	0.076	0.06	0.058	0.061	0.066	2015-10-16	0.0816502	0.0644607	0.062312	0.065535	0.0709067
T=1	2015-10-20	0.057	0.055	0.056	0.058	0.059	2015-10-20	0.0612376	0.059089	0.0601633	0.062312	0.0633863	T=1	2015-10-20	0.234	0.299	0.159	0.267	0.17	2015-10-20	0.251397	0.321229	0.170821	0.28685	0.182639	T=1	2015-10-20	0.082	0.067	0.059	0.066	0.076	2015-10-20	0.0880963	0.0719811	0.0633863	0.0709067	0.0816502
T=2	2015-10-23	0.059	0.062	0.058	0.059	0.059	2015-10-23	0.0633863	0.0666094	0.062312	0.0633863	0.0633863	T=2	2015-10-23	0.317	0.377	0.219	0.333	0.197	2015-10-23	0.340567	0.405028	0.235281	0.357757	0.211646	T=2	2015-10-23	0.1	0.064	0.059	0.063	0.059	2015-10-23	0.107434	0.0687581	0.0633863	0.0676837	0.0633863
T=3	2015-10-30	0.057	0.058	0.058	0.057	0.059	2015-10-30	0.0612376	0.062312	0.062312	0.0612376	0.0633863	Extra	2015-10-26	0.388	0.45	0.259	0.405	0.222	2015-10-26	0.416846	0.483455	0.278255	0.43511	0.238505	T=3	2015-10-30	0.151	0.062	0.057	0.062	0.06	2015-10-30	0.162226	0.0666094	0.0612376	0.0666094	0.0644607
T=4	2015-11-06	0.095	0.089	0.098	0.097	0.08	2015-11-06	0.102063	0.0956167	0.105286	0.104211	0.0859476	T=3	2015-10-30	0.575	1.332	0.822	1.36	0.577	2015-10-30	0.617748	1.43103	0.883111	1.46111	0.619897	T=4	2015-11-06	0.184	0.098	0.083	0.099	0.104	2015-11-06	0.197679	0.105286	0.0891706	0.10636	0.111732
T=5	2015-11-09	0.072	0.079	0.086	0.09	0.065	2015-11-09	0.0773528	0.0848732	0.0923936	0.096691	0.0698324	Extra	2015-11-02	0.607	0.694	0.403	0.617	0.281	2015-11-02	0.652127	0.745595	0.432961	0.662871	0.301891	T=5	2015-11-09	0.152	0.078	0.073	0.085	0.084	2015-11-09	0.1633	0.0837989	0.0784272	0.0913193	0.090245
T=6	2015-11-13	0.08	0.079	0.091	0.07	0.095	2015-11-13	0.0859476	0.0848732	0.0977654	0.0752041	0.102063	T=4	2015-11-06	0.759	0.853	0.485	0.736	0.316	2015-11-06	0.815428	0.916416	0.521057	0.790718	0.339493	T=6	2015-11-13	0.164	0.082	0.078	0.081	0.092	2015-11-13	0.176193	0.0880963	0.0837989	0.0870219	0.0988397
													T=5	2015-11-09	0.89	0.967	0.57	0.842	0.336	2015-11-09	0.956167	1.03889	0.612376	0.904598	0.36098
													T=6	2015-11-13	0.931	1.011	0.674	0.345	0.949	2015-11-13	1.00021	1.08616	0.724108	0.370649	1.01955
2015-10-26
FeCl2 Concentration (mM)	Absorbance
20	19.404
10	8.673
5	3.22
2.5	1.6
1	0.604
0.5	0.333
0.25	0.201

## Sheet: Sulfide Data
32B							A72							Oxbow
T=X	Date	1 (DOC)	2 (DOC)	3 (DOC)	(Acetate)	(Control)	T=X	Date	1 (DOC)	2 (DOC)	3 (DOC)	(Acetate)	(Control)	T=X	Date	1 (DOC)	2 (DOC)	3 (DOC)	(Acetate)	(Control)
T=0	2015-10-16	0.082	0.082	0.085	0.085	0.075	T=0	2015-10-16	0.08	0.061	0.06	0.064	0.065	T=0	2015-10-16	0.16	0.148	0.081	0.143	0.156
T=1	2015-10-20	0.073	0.066	0.068	0.075	0.079	T=1	2015-10-20	0.061	0.059	0.06	0.06	0.059	T=1	2015-10-20	0.181	0.11	0.085	0.107	0.114
T=2	2015-10-23	0.072	0.072	0.071	0.073	0.075	T=2	2015-10-23	0.062	0.059	0.059	0.064	0.061	T=2	2015-10-23	0.106	0.11	0.087	0.092	0.111
T=3	2015-10-30	0.067	0.068	0.066	0.076	0.067	T=3	2015-10-30	0.059	0.059	0.059	0.062	0.059	T=3	2015-10-30	0.078	0.088	0.071	0.081	0.074
T=4	2015-11-06	0.075	0.073	0.08	0.079	0.08	T=4	2015-11-06	0.068	0.064	0.064	0.064	0.065	T=4	2015-11-06	0.09	0.079	0.078	0.081	0.079
T=5	2015-11-09	0.079	0.069	0.072	0.074	0.078	T=5	2015-11-09	0.068	0.136	0.063	0.077	0.078	T=5	2015-11-09	0.077	0.08	0.084	0.102	0.09
T=6	2015-11-13	0.08	0.071	0.075	0.08	0.076	T=6	2015-11-13	0.067	0.21	0.064	0.076	0.078	T=6	2015-11-13	0.081	0.078	0.085	0.91	0.15
Na2S (μM)	Abs. (665 nm)
100	1.231
90	1.14
80	0.967
70	0.84
60	0.76
50	0.605
40	0.473
30	0.324
20	0.201
10	0.086
5	0.03
1	0.003

## Sheet: TOC Data
River Water Concentrated DOC				32B River Water		A72 River Water
Run 1 10/13/15 1:10 Dilution		Run 2 10/13/15		2015-10-13		2015-10-13
TC	NPOC	TC	NPOC	TC	NPOC	TC	NPOC
2.997	3.08	3.11	2.78	2.967	2.75	2.239	1.32
3.686	2.93	2.722	2.75	2.93	2.77	2.213	1.28
3.13	2.77	3.153	2.85	2.926	2.84	2.241	1.32
STD Dev
0.29843	0.126579	0.193837	0.0418994	0.0184572	0.0385861	0.0127541	0.0188562

## Sheet: IC data
	Acetate Concentration (mM)
			D.O.C.	D.O.C.	D.O.C.	No Carbon	Acetate					D.O.C.	D.O.C.	D.O.C.	No Carbon	Acetate	D.O.C.	D.O.C.	D.O.C.	No Carbon	Acetate					Autoclaved	Autoclaved	Autoclaved	D.O.C.	Acetate	No Carbon	Autoclaved
Date			A1	A2	A3	A4	A5		Date			B1	B2	B3	B4	B5	O1	O2	O3	O4	O5		Date			A6	B6	O6	BB1	BB2	BB3	BB4
2015-10-16	0 Days	T=0	0	0	0	0	0		2015-10-16	0 Days	T=0	0	0	0	0	0	0	0	0	0	0		2015-10-16
2015-10-20	4 Days	T=1	0	0	0	0	28.9		2015-10-20	4 Days	T=1	0	0	0	0	29.95	0	0	0	0	35.5		2015-10-20
2015-10-23	7 Days	T=2	0	0	0	0	28.9		2015-10-23	7 Days	T=2	0	0	0	0	37.25	0	0	0	4.2	33.65		2015-10-23
2015-10-30	14 Days	T=3	0	0	0	0	25.55		2015-10-30	14 Days	T=3	0	0	0	0	32.9	0	0	0	3.25	28.6		2015-10-30
2015-11-02	17 Days	T=4	0	0	0	0	29.25		2015-11-02														2015-11-02	0 Days	T=0	4.15	0	9.2	0	29.15	0	0
2015-11-06	21 Days *	T=5	0	0	0	0	26.75		2015-11-06	21 Days *	T=4	0	0	0	0	19.05	0	0	0	4.75	23.65		2015-11-06
2015-11-09	24 Days	T=6	0	0	0	0	3.95		2015-11-09	24 Days	T=5	0	0	0	0	15.6	0	0	0	0	0		2015-11-09	7 Days *	T=1	3.7	0	9	0	22.5	0	0
2015-11-13	28 Days	T=7	0	0	0	0	29.65		2015-11-13	28 Days	T=6	0	0	0	0	7.25	0	0	0	0	0		2015-11-13	11 Days	T=2	0	0	0	0	21.5	0	0
																							2015-11-16	14 Days	T=3	0	0	0	0	0	0	0
	Sulfate Concentration (mM)
			D.O.C.	D.O.C.	D.O.C.	No Carbon	Acetate					D.O.C.	D.O.C.	D.O.C.	No Carbon	Acetate	D.O.C.	D.O.C.	D.O.C.	No Carbon	Acetate					Autoclaved	Autoclaved	Autoclaved	D.O.C.	Acetate	No Carbon	Autoclaved
Date			A1	A2	A3	A4	A5		Date			B1	B2	B3	B4	B5	O1	O2	O3	O4	O5		Date			A6	B6	O6	BB1	BB2	BB3	BB4
2015-10-16	0 Days	T=0	2.75	1.7	2.5	2.75	2.85		2015-10-16	0 Days	T=0	1.5	1.45	1.6	1.6	1.55	0.85	1.4	2.05	1.8	1.5		2015-10-16
2015-10-20	4 Days	T=1	3.05	2.8	2.65	3.35	4.15		2015-10-20	4 Days	T=1	1.3	1.45	1.45	1.35	1.35	0.2	0.75	1.7	1.25	0.7		2015-10-20
2015-10-23	7 Days	T=2	3.2	3.25	2.85	3.25	4.25		2015-10-23	7 Days	T=2	1.3	1.2	1.4	1.3	1.25	0	0.35	1.55	0.75	0.2		2015-10-23
2015-10-30	14 Days	T=3	3.2	3.5	2.85	3.6	4.15		2015-10-30	14 Days	T=3	1.25	1.3	1.35	1.05	0.75	0	0	0.8	0	0		2015-10-30
2015-11-02	17 Days	T=4	6.05	5.85	6.15	3.75	4.4		2015-11-02														2015-11-02	0 Days	T=0	11.1	0.95	12.75	3.3	3	2.75	3.25
2015-11-06	21 Days *	T=5	8.55	21.9	8.4	7.45	15		2015-11-06	21 Days *	T=4	14.55	3.8	8.45	3.65	6.1	12.35	13.35	17.4	12.75	16.6		2015-11-06
2015-11-09	24 Days	T=6	0	13.95	0	0.65	1.5		2015-11-09	24 Days	T=5	2.9	0	3.6	0.15	5.4	2.6	3.8	1.3	3.15	0.75		2015-11-09	7 Days *	T=1	8.65	1.65	13.55	0.6	3	2.35	0
2015-11-13	28 Days	T=7	0	0	0	0	0		2015-11-13	28 Days	T=6	0	0	0	0.3	0.1	1.4	0	0.3	0	0		2015-11-13	11 Days	T=2	0	0	0	0	0	0	0
																							2015-11-16	14 Days	T=3	0	0	0	0	0	0	0
	* ~ 20 mM sulfate added before sample taken for IC analysis																							* ~ 20 mM sulfate added after sample taken for IC analysis

## Sheet: XRD Data
Location	Minerals
A72 0 Days	Quartz	Muscovite	Jarosite	Orthoclase	Illite	Chamosite	Lepidocrocite
A72 DOC 28 Days	Quartz	Muscovite	Orthoclase	Illite	Chamosite
A72 No Carbon 28 Days	Quartz	Muscovite	Orthoclase	Illite	Chamosite
A72 Acetate 28 Days	Quartz	Muscovite	Illite	Orthoclase
32nd Street Bridge 0 Days	Quartz	Albite	AlPO4	Zeolite group	Orthoclase	Amphibole
32nd Street Bridge DOC 28 Days	Quartz	Albite	AlPO4	Chamosite	Orthoclase
32nd Street Bridge No Carbon 28 Days	Quartz	Albite	AlPO4	Zeolite group	Orthoclase
32nd Street Bridge Acetate 28 Days	Quartz	Albite	AlPO4	Orthoclase
Oxbow Park 0 Days	Quartz	Anorthoclase	Muscovite	AlPO4	Amphibole
Oxbow Park DOC 28 Days	Quartz	Anorthoclase	Muscovite	AlPO4	Amphibole
Oxbow Park No Carbon 28 Days	Quartz	Albite	Muscovite	AlPO4	Amphibole
Oxbow Park Acetate 28 Days	Quartz	Anorthoclase	Muscovite	AlPO4	Amphibole

## Sheet: Sediment Extraction Data
Location	As Average (mg kg-1)	As std dev	Cu Average (mg kg-1)	Cu std dev	Fe Average (mg kg-1)	Fe std dev	Mg Average (mg kg-1)	Mg std dev	Mn Average (mg kg-1)	Mn std dev	Mo Average (mg kg-1)	Mo std dev	Pb Average (mg kg-1)	Pb std dev	Sr Average (mg kg-1)	Sr std dev	Zn Average (mg kg-1)	Zn std dev	Hg Average (ug kg-1)	Hg std dev
A72	11.12	0.58	50.8	2.7	3018.3	38.7	4108.9	131.4	812.6	26	3.4	0.19	255.9	15.7	46.1	2.6	406.8	14.8	337.2	4.2
Oxbow Park	1.33	0.05	20.3	0.3	3626.5	6.6	1703.1	21.8	2906.8	155.2	0.45	0	27.8	0.4	5.9	0.1	1026.2	24.9	31.1	0.4
32nd Street Bridge	1.44	0.14	20.9	1.7	3615.2	3.4	1319.1	650.4	2854	174	0.36	0.03	26.6	2.1	3.8	0.3	1477	42.4	46.8	0.2
